# Supplementary material for: Integrated Analysis of a Gene Correlation Network Identifies Critical Regulation of Fibrosis by lncRNAs and TFs in Idiopathic Pulmonary Fibrosis
Source: Hindawi journal article supplement (doi:10.1155/2020/6537462), 2020-01-01
Supplement: f1 [file 6537462.f1.pdf]

Fig. S1 Hierarchical clustering using differentially expressed genes across all samples from GSE2052.

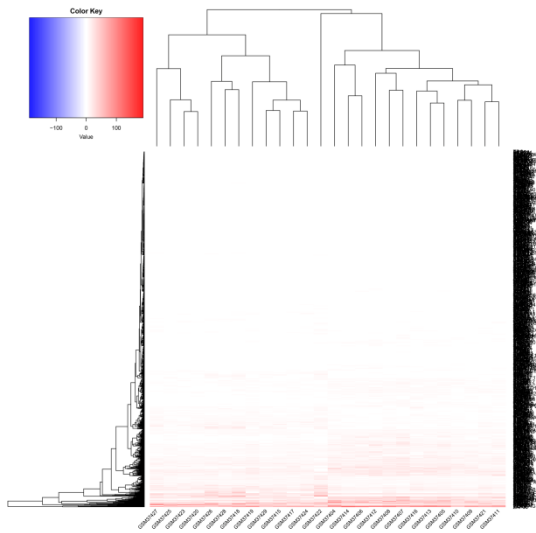

Fig. S2 Hierarchical clustering using differentially expressed genes across all samples from GSE44723.

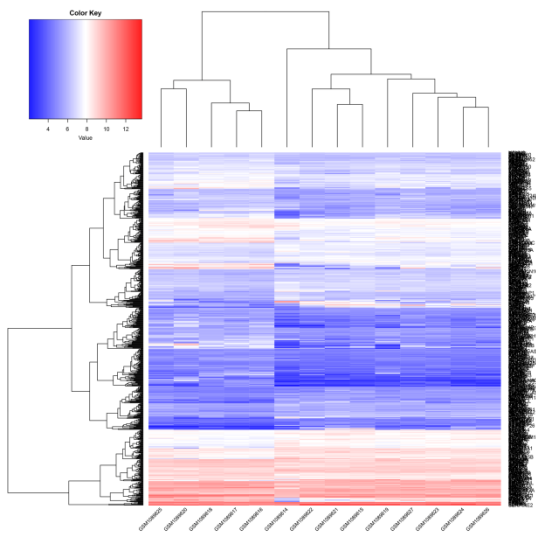

Fig. S3 Hierarchical clustering using differentially expressed genes across all samples from GSE24206.

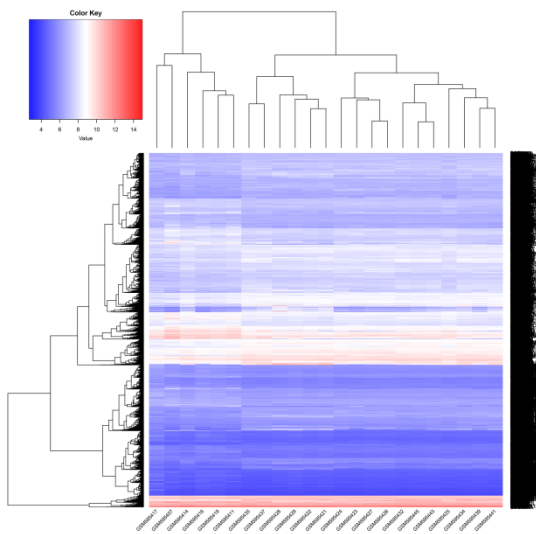

Fig. S4 The relative expression of the key genes was analyzed by RT-PCR.

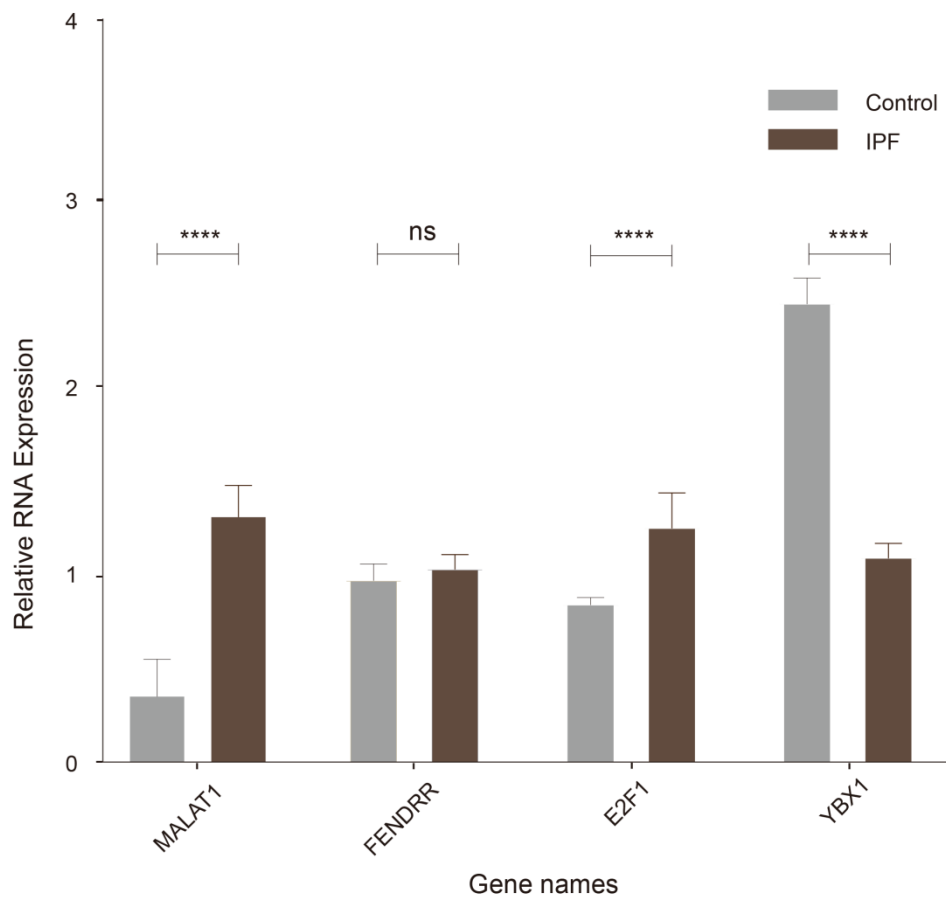

## Supplementary Materials

*Table S1. Sequences of primers for candidate genes*

| Gene   | Primers (5'-3')          |                          |
|--------|--------------------------|--------------------------|
|        | Forward                  | Reverse                  |
| MALAT1 | AATGTTAAGAGAAGCCCAGGG-3  | AAGGTCAAGAGAAGTGTTCAGC   |
| FENDRR | TAAAATTGCAGATCCTCCG      | AACGTTCGCATTGGTTTAGC     |
| E2F1   | CACCATAGTGTCACCACCACCATC | TCTTGCTCCAGGCTGAGTAGAGAC |
| YBX1   | ACAGAGCTGGACTGCGGTAT     | TAGTAACCGGGTGCGGTAGA     |
| GAPDH  | CCTGCACCACCAACTGCTTAG    | GTGGATGCAGGGATGATGTTC    |

*Table S2. The RT-PCR results of four candidate genes*

| Gene name | group     |           | P value |
|-----------|-----------|-----------|---------|
|           | IPF       | Control   |         |
| MALAT1    | 1.31±0.17 | 0.35±0.20 | P<0.001 |
| FENDRR    | 1.05±0.08 | 0.99±0.09 | P>0.05  |
| E2F1      | 1.27±0.19 | 0.86±0.04 | P<0.001 |
| YBX1      | 1.11±0.08 | 2.47±0.14 | P<0.001 |
